# Supplementary material for: Targeted photosensitizer nanoconjugates based on human serum albumin selectively kill tumor cells upon photo-irradiation
Source: Royal Society of Chemistry journal article supplement (doi:10.1039/c5ra05251c), 2015-01-01
Supplement: c5ra05251c1.pdf [file c5ra05251c1.pdf]

## Supporting data

### Targeted photosensitizer nanoconjugates based on human serum albumin selectively kill tumor cells upon photo-irradiation

Cheng-Yi Tang <sup>a,b,1</sup>, Yong-hui Liao <sup>a,1</sup>, Xiao-Ming Wang <sup>a,b</sup>, Gui-Hua Lu <sup>a,b</sup> and Yong-Hua

Yang <sup>a,b,\*</sup>

#### Affiliations:

<sup>a</sup>State Key Laboratory of Pharmaceutical Biotechnology, NJU-NJFU Joint Institute of Plant Molecular Biology, School of Life Sciences, Nanjing University, Nanjing 210093, China.

<sup>b</sup>Co-Innovation Center for Sustainable Forestry in Southern China, Nanjing Forestry University, Nanjing 210037, China

<sup>1</sup>These authors contributed equally.

\*Corresponding author. Tel/fax: +86-25-89686305

E-mail address: yangyh@nju.edu.cn

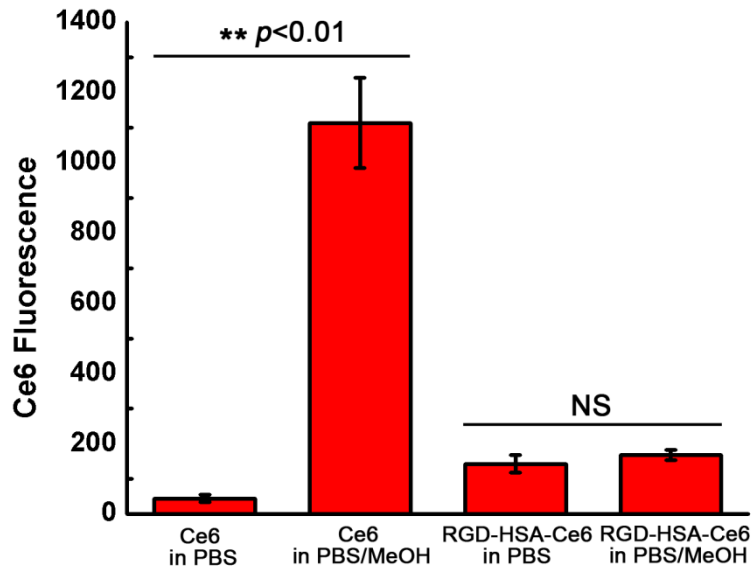

SFigure 1: Ce6 fluorescence of free Ce6 (10 $\mu$ M) and RGD-HSA-Ce6 (10 $\mu$ M of Ce6) dissolved in PBS or PBS/Methanol (v/v=1/1) mixed solvent. n=3, \*\*  $p<0.01$  and NS no significance.

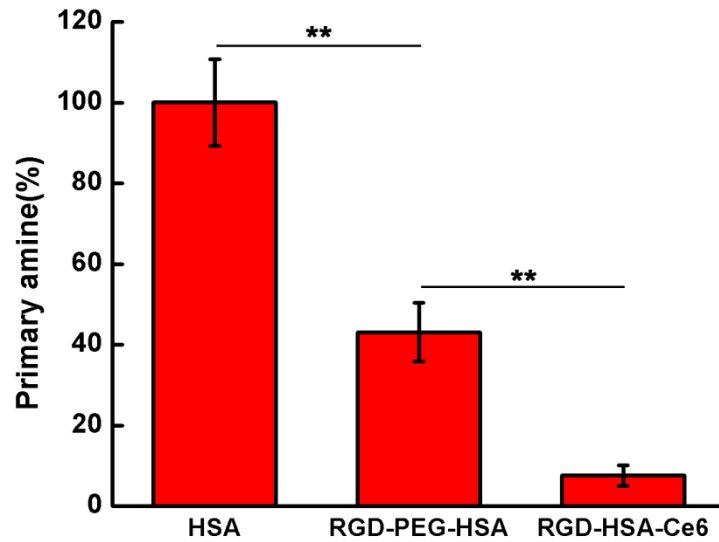

SFigure 2: Primary amine of HSA, RGD-PEG-HSA and RGD-HSA-Ce6. Each group contains 5  $\mu$ M of HSA. n=3, \*\*  $p<0.01$ .

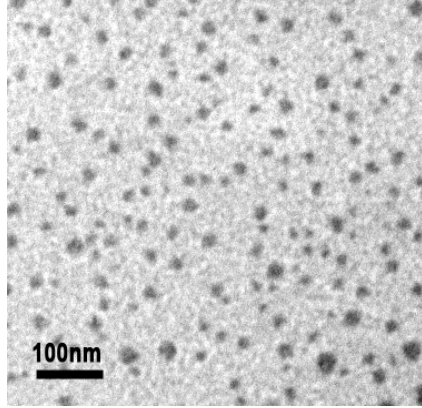

Figure 3: Transmission electron microscopy (TEM) image of RGD-HSA-Ce6.
